# Supplementary material for: Enhanced ice nucleation efficiency of microcline immersed in dilute NH 3 and NH 4 + -containing solutions
Source: Copernicus journal article supplement (doi:10.5194/acp-2018-46), 2018-01-22
Supplement: Supplementary file 1 [file acp-2018-46-supplement.zip]

Archive with 3 entries (3 files):
- Supplementary Material S2.pdf
- Supplementary Material S3.pdf
- Supplementary Material S1.pdf
